# Supplementary material
Source: Springer Nature journal article supplement (https://www.springermedizin.de/resource/supplementary/12890_2011_313_MOESM2_ESM.pdf/9504922)

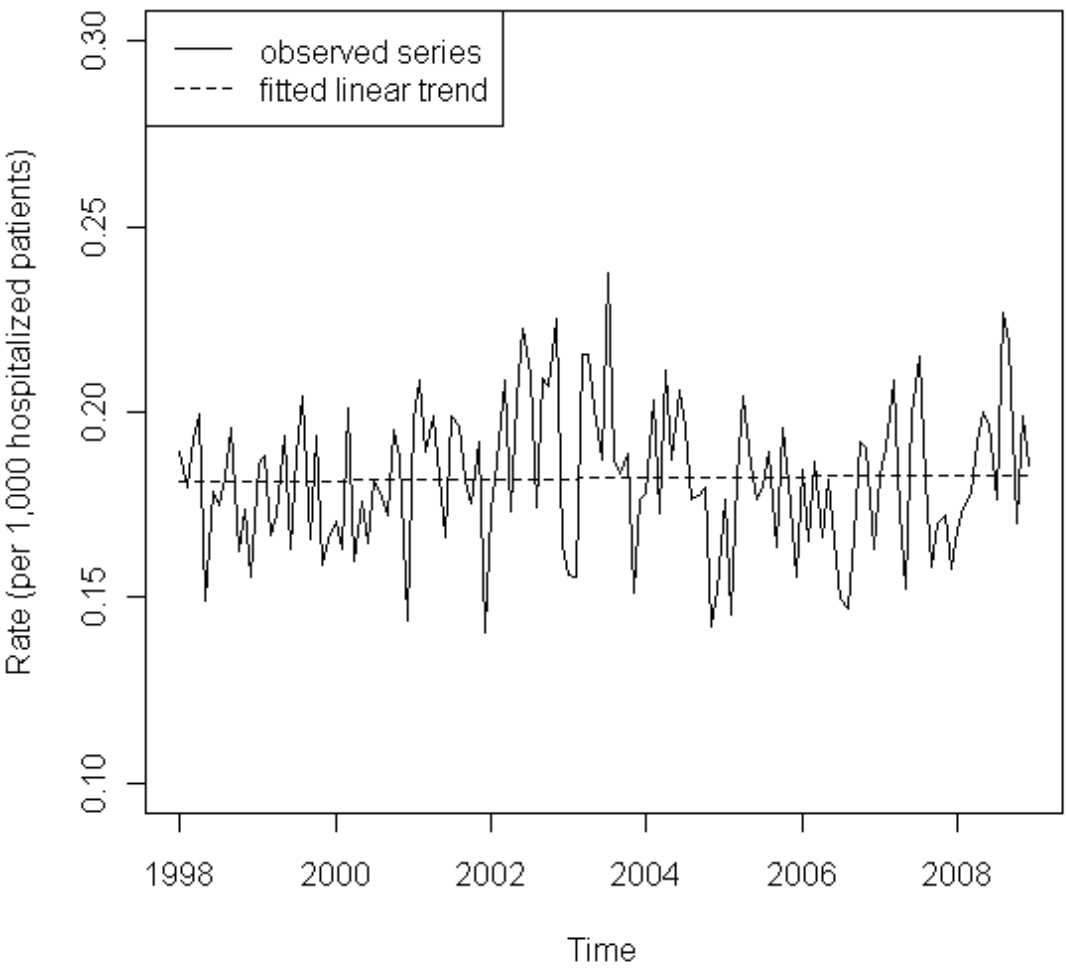

Supplement: MOESM2 [file 9504922]
